# Supplementary material for: CD47 restricts antiviral function of alveolar macrophages during influenza virus infection
Source: PubMed Central journal article supplement — iScience. 2022 Nov 11;25(12):105540. doi: 10.1016/j.isci.2022.105540 (PMC9682344; doi:10.1016/j.isci.2022.105540), 2022-11-11

iScience, Volume 25

## **Supplemental information**

### **CD47 restricts antiviral function of alveolar macrophages during influenza virus infection**

**Christina Wenzek, Philine Steinbach, Florian Wirsdörfer, Kathrin Sutter, Julia D. Boehme, Robert Geffers, Robert Klopffleisch, Dunja Bruder, Verena Jendrossek, Jan Buer, Astrid M. Westendorf, and Torben Knuschke**

# Figure S1. Deficiency of CD47 does not enhance adoptive immune responses in the lung, Related to Figure 1

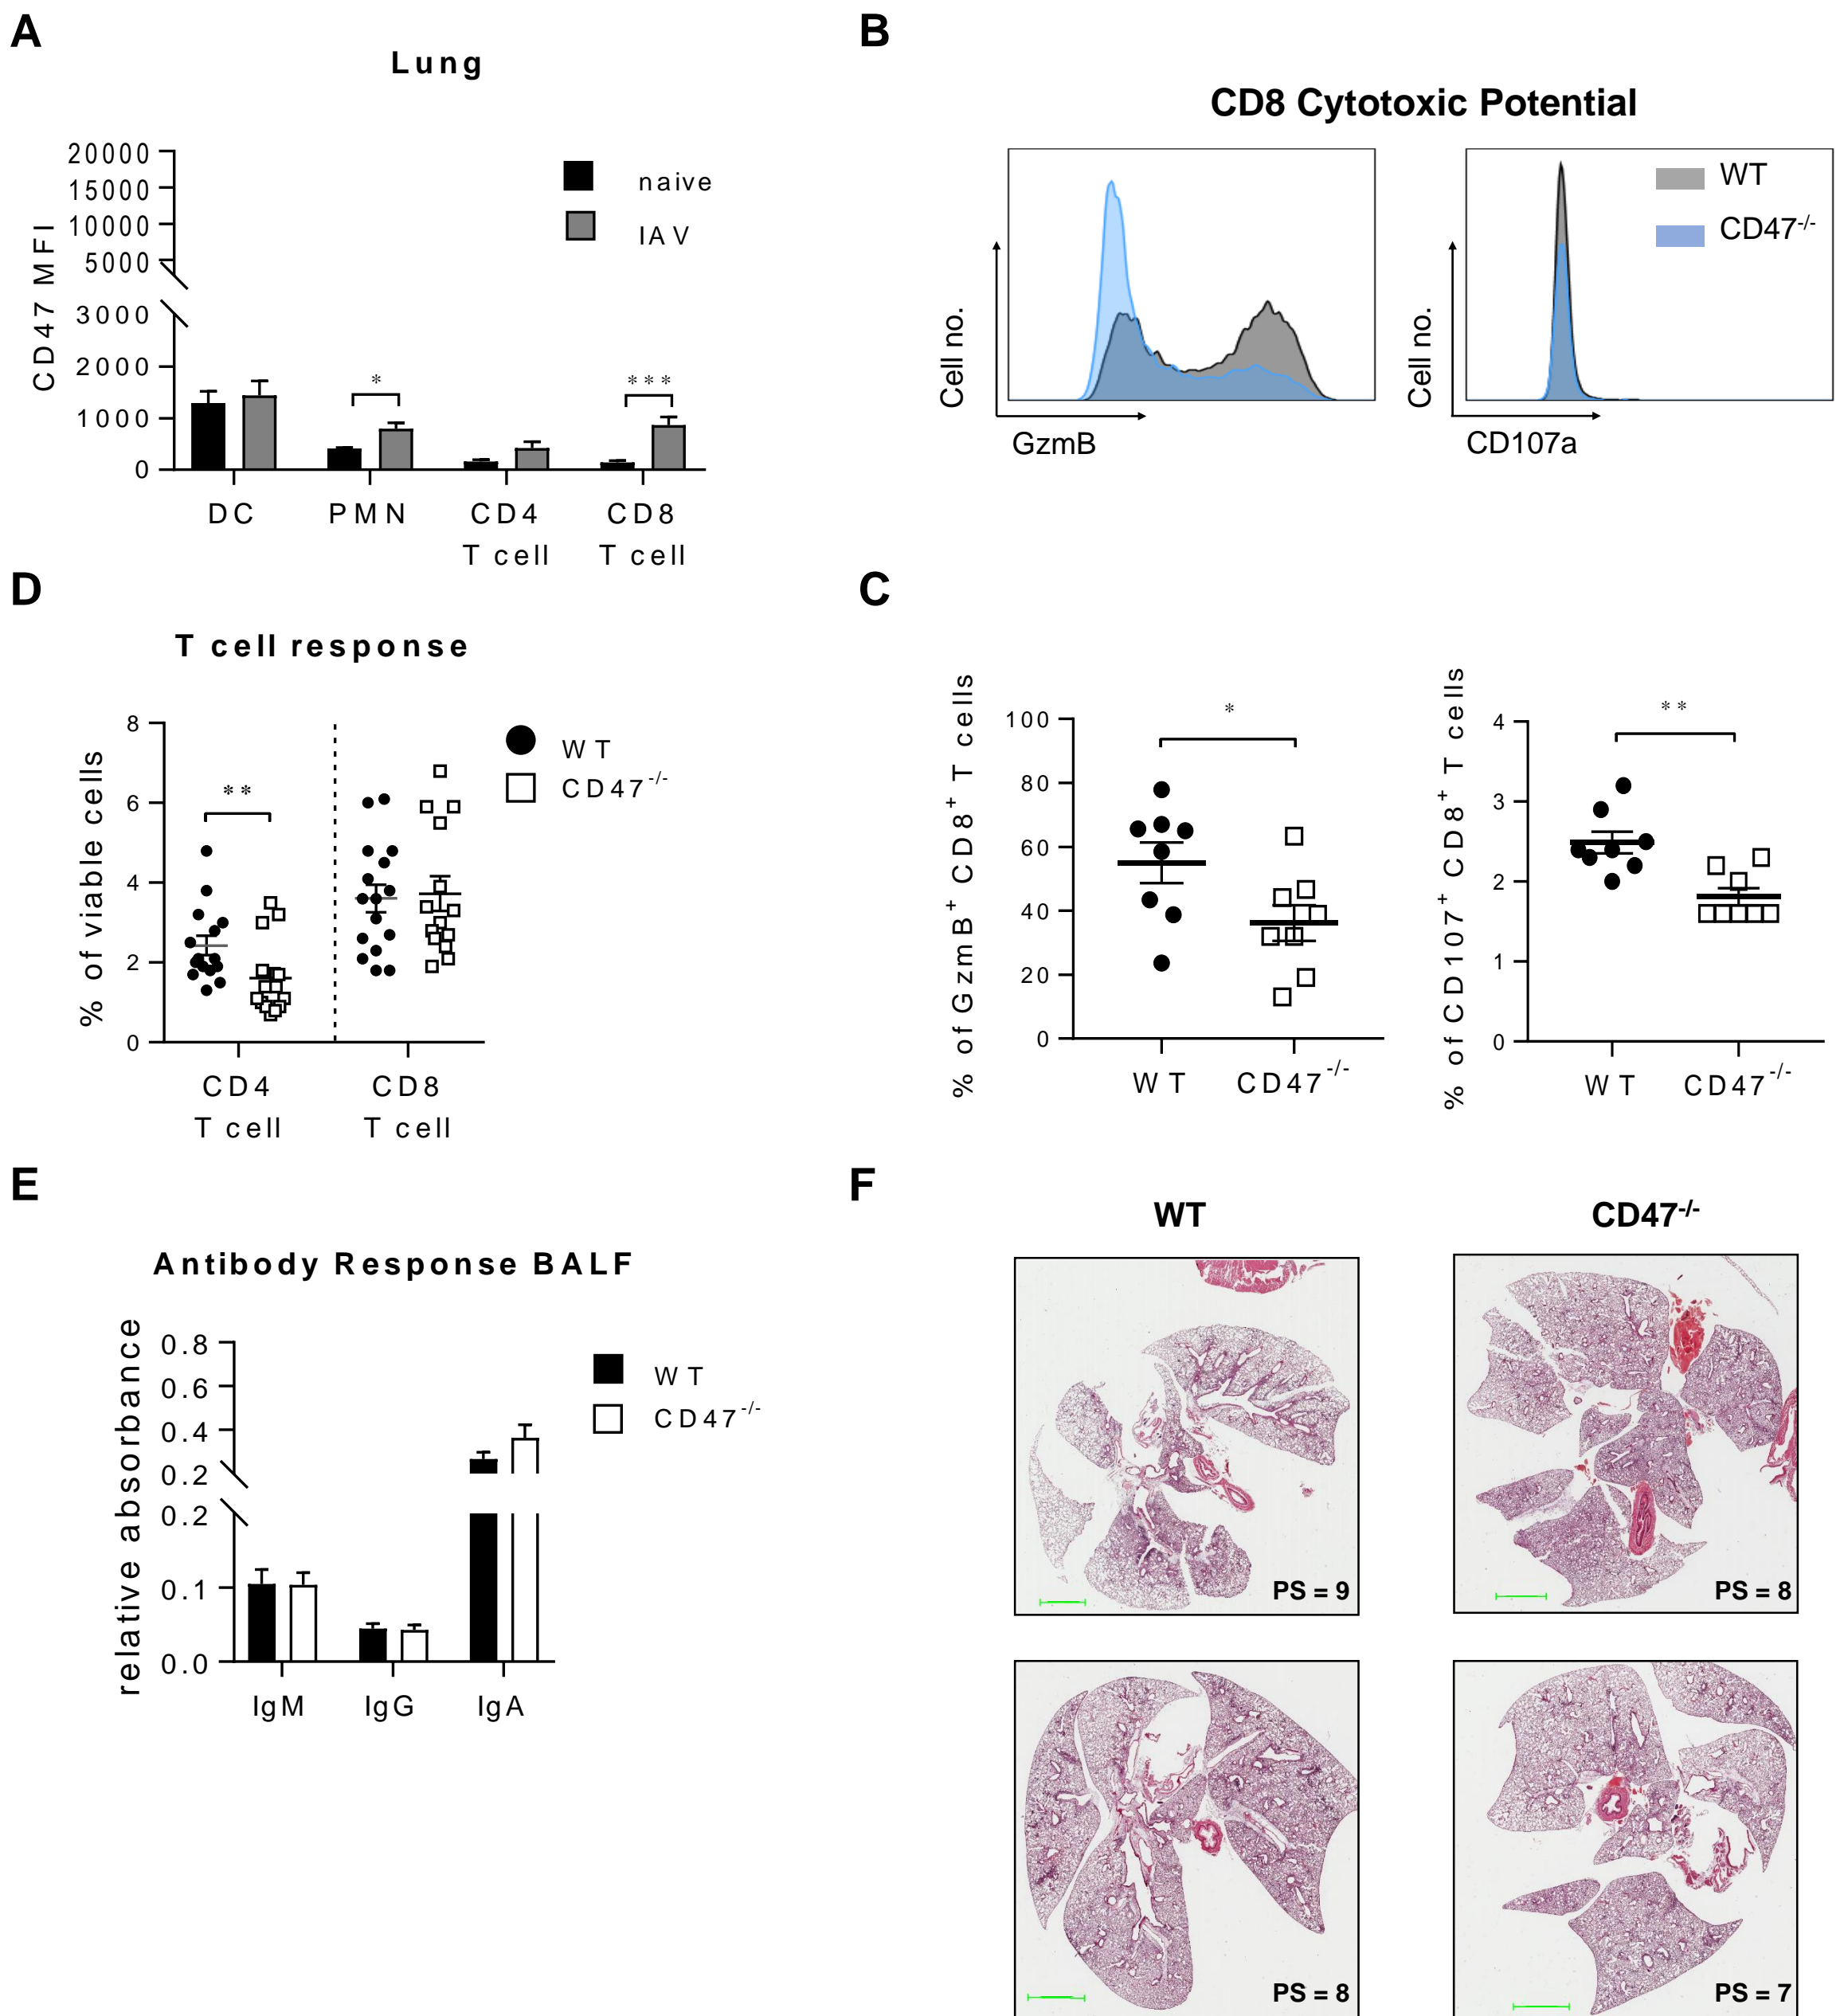

**Figure S1. Deficiency of CD47 does not enhance adoptive immune responses in the lung.**

A) Dendritic cells (DC), neutrophils (PMN) (both 3 dpi) as well as CD4<sup>+</sup> and CD8<sup>+</sup> T cells (7 dpi) were analysed via flow cytometry regarding the mean fluorescence intensity (MFI) of CD47 (n=9 (naive) – 12 (IAV) (IAV 75 PFU). B) Representative histograms for granzyme B (GzmB) and CD107a expression by CD8<sup>+</sup> T cells in the lung 7 dpi. C) CD8<sup>+</sup> T cells were analysed regarding the frequencies of GzmB and CD107a expressing cells upon restimulation. D) The frequencies of CD4<sup>+</sup> and CD8<sup>+</sup> T cells in the lung were examined 7 dpi. E) Influenza specific antibodies in the BALF of IAV infected mice were detected via ELISA 7 dpi (n=9). Results from two independent experiments are shown. Student's t-test was performed. \* = p<0.05. F) Histopathology was scored (PS) after H&E staining in a blinded manner according to the inflammation markers, including inflammatory cell infiltration, cell necrosis, granulocyte infiltration and histiocytosis. Two representative lungs per group are shown (scale bar = 2 mm).

## Figure S2. Low dose infection does not lead to enhanced virus clearance, Related to Figure 1

A

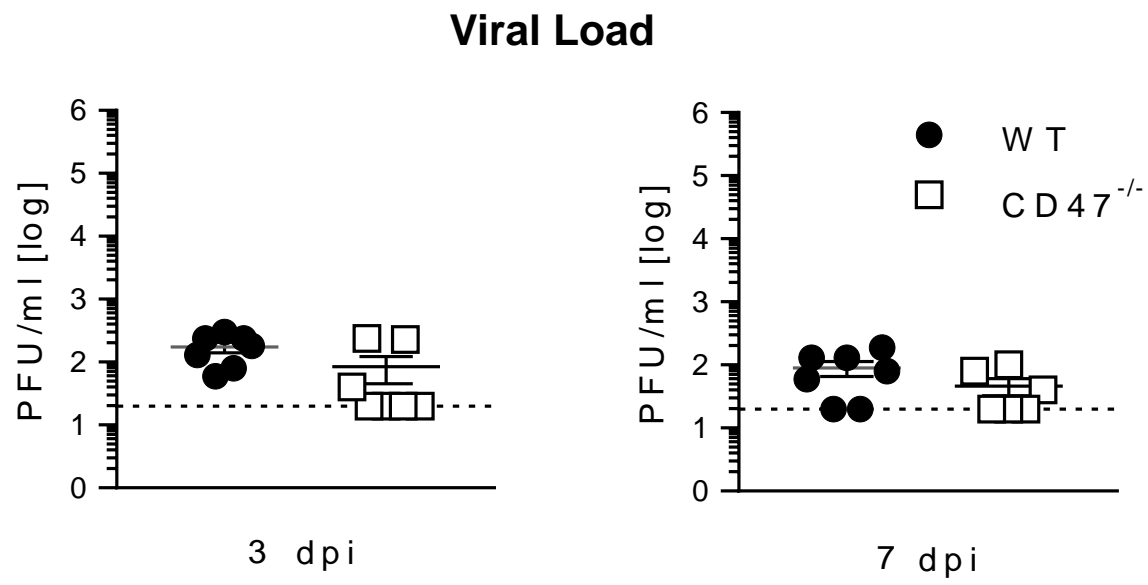

B

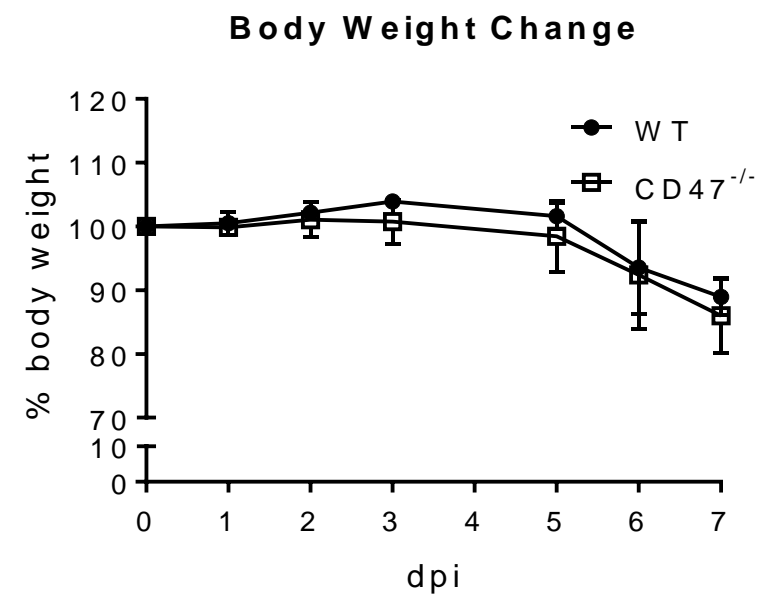

**Figure S2. Low dose infection does not lead to enhanced virus clearance.** Wildtype (WT) and CD47<sup>-/-</sup> mice were i.n. infected with 8 PFU of influenza virus A/PR8/34. A) Viral load in the lung of mice infected was determined at days 3 and 7 after infection via plaque assay. B) Body weight change after infection with 8 PFU (n=3). Results from two independent experiments are shown.

## Figure S3. Flow cytometry of alveolar macrophages in the lung, Related to Figure 2

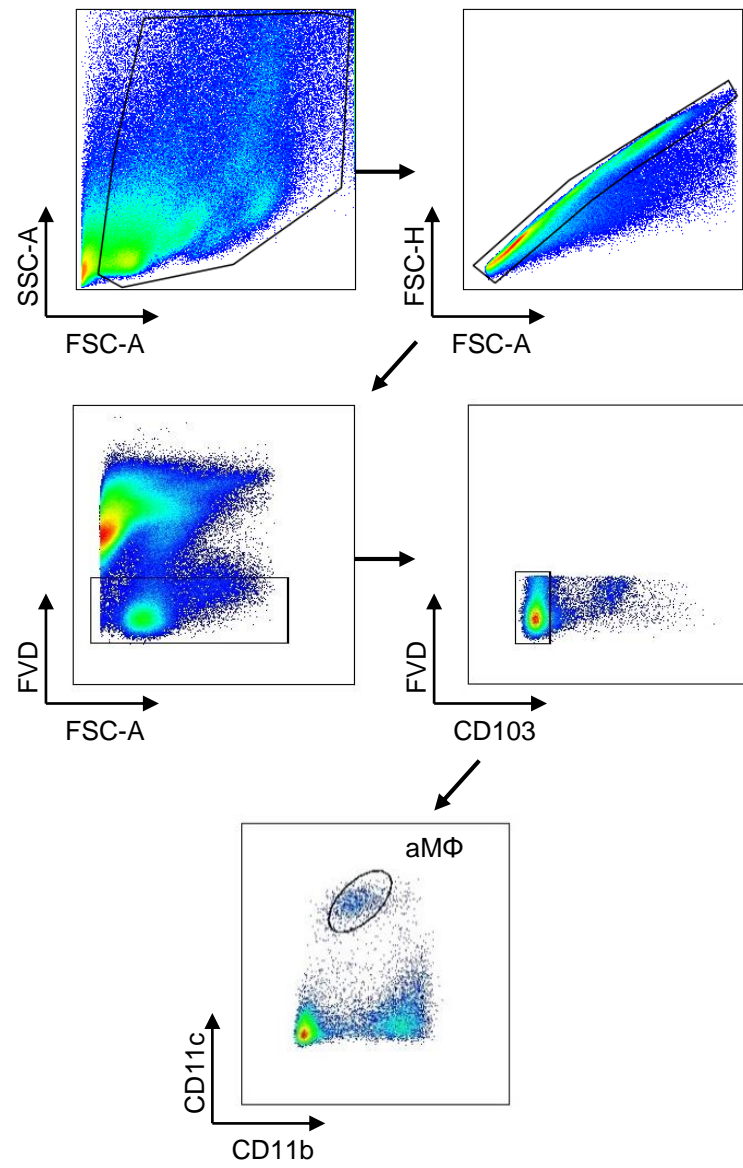

**Figure S3. Flow cytometry of alveolar macrophages in the lung.** aMΦ were differentiated by CD11c and CD11b expression. DCs were excluded by previously gating on CD103<sup>-</sup> cells.

## Figure S4. Alveolar macrophages of CD47<sup>-/-</sup> mice do not show a proinflammatory phenotype, Related to Figure 4

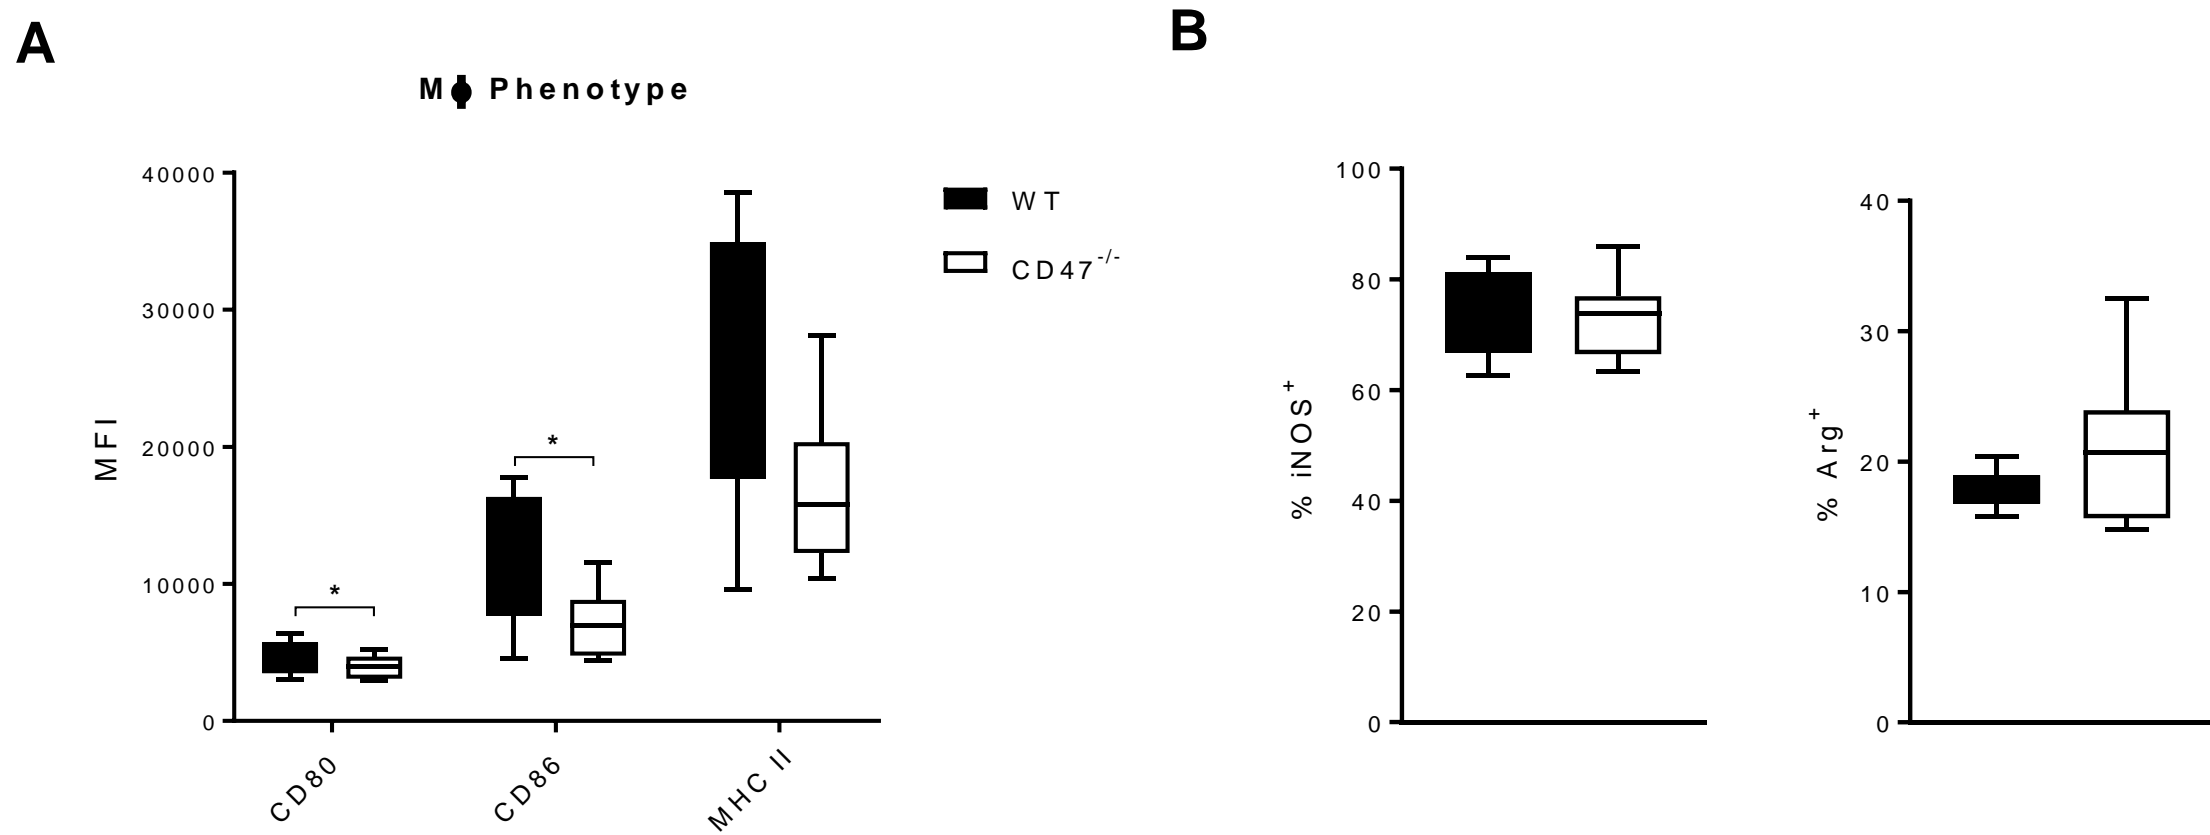

**Figure S4. Alveolar macrophages of CD47<sup>-/-</sup> mice do not show a proinflammatory phenotype.** A) Flow cytometric analysis of CD80, CD86, and MHC II expression by aMΦ from the lung 3 dpi (n=9). Mean fluorescent intensity (MFI) is shown. B) Frequencies of iNOS and arginase (Arg) expressing aMΦ in the lung 3 dpi (n=9). C) Data shown are mean ± SEM. Student's t-test and one-way ANOVA with Tukey's multiple-comparisons post-test was performed. \* = p<0.05, \*\* = p<0.01. Results from two independent experiments are shown.

# Figure S5. HB expression by immune cells in the lung, Related to Figure 6

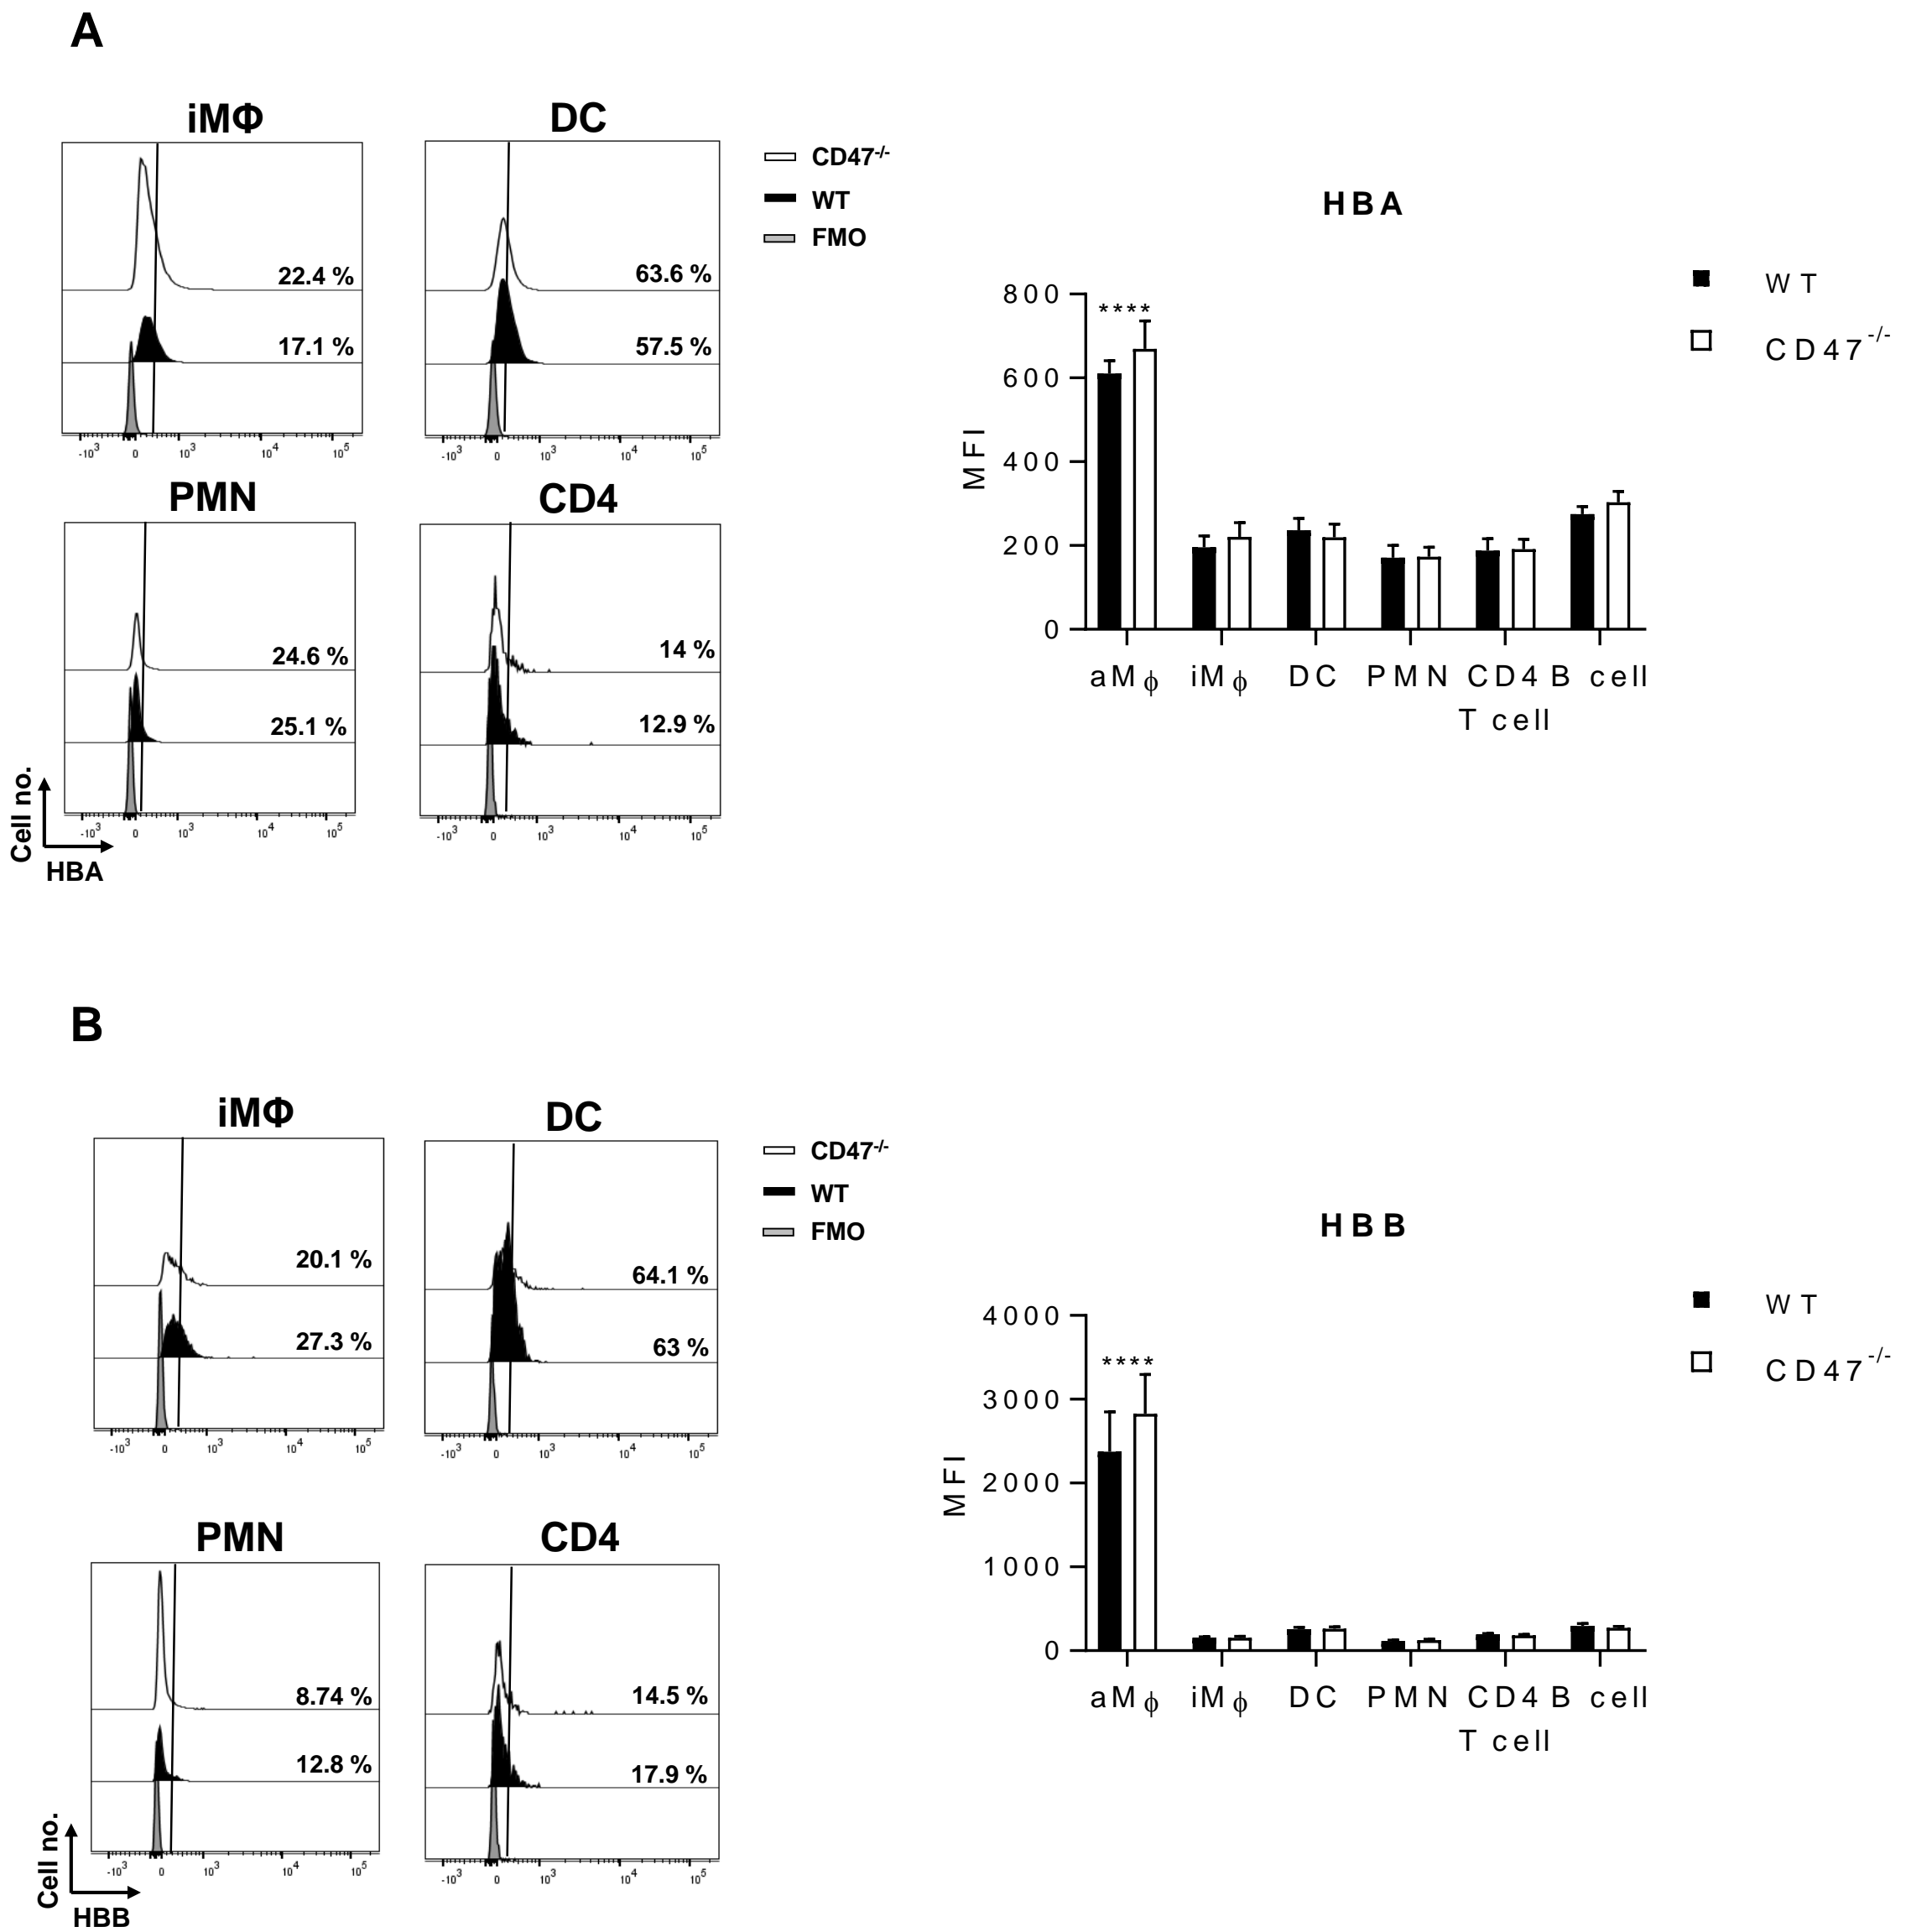

Supplement: mmc1.pdf [file mmc1.pdf]
